# Supplementary material for: Participation of L-Lactate and Its Receptor HCAR1/GPR81 in Neurovisual Development
Source: MDPI journal article supplement (doi:10.3390/cells10071640), 2021-06-30
Supplement: s1 [file s1]

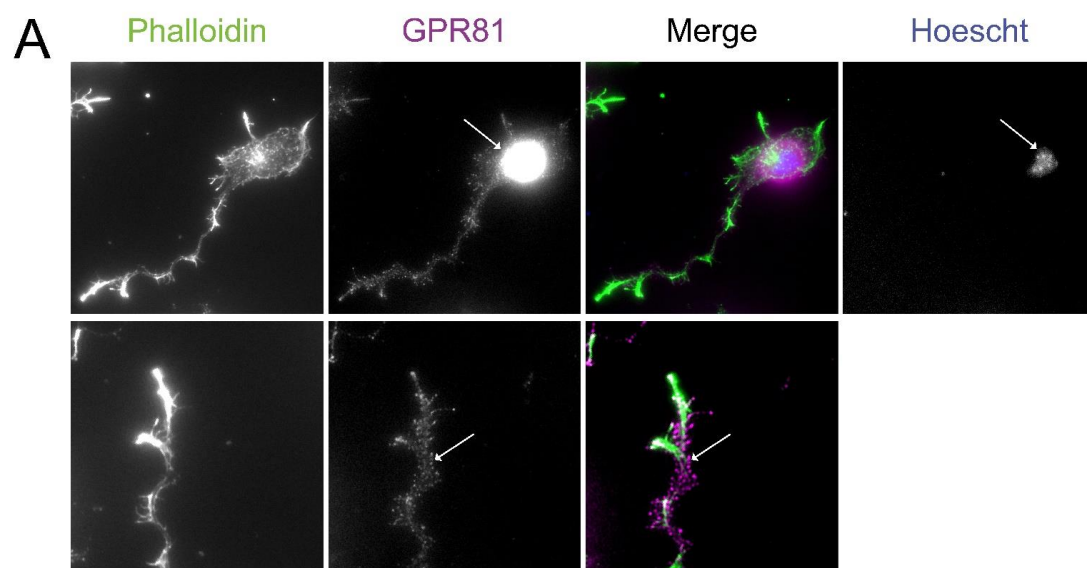

**Figure S1. GPR81 is expressed in DIV2 E15 cortical neuron** (A) GPR81 is predominantly expressed in the soma, neurite and growth cone. The white arrows indicate colocalization of GPR81 with Hoechst or phalloidin staining.
